# Supplementary material for: Myocardial Adipose Triglyceride Lipase Overexpression Protects against Burn-Induced Cardiac Lipid Accumulation and Injury
Source: Hindawi journal article supplement (doi:10.1155/2019/6428924), 2019-05-16
Supplement: f1 [file 6428924.f1.pdf]

**Myocardial adipose triglyceride lipase overexpression protects against burn-induced cardiac lipid accumulation and injury**

Lingfei Li<sup>1,2</sup>, Xingyue Zhang<sup>1,2</sup>, Qiong Zhang<sup>1,2</sup>, Jiezhai Jia<sup>1,2</sup>, Junhui Zhang<sup>1,2</sup>, Dongxia Zhang<sup>1,2</sup>, Huapei Song<sup>1,2</sup>, Bing Chen<sup>3</sup>, Jiongyu Hu<sup>2,3\*</sup>, Yuesheng Huang<sup>1,2\*</sup>

<sup>1</sup>Institute of Burn Research, Southwest Hospital, Third Military Medical University (Army Medical University), Chongqing, China.

<sup>2</sup>State Key Laboratory of Trauma, Burns and Combined Injury, Southwest Hospital, Third Military Medical University (Army Medical University), Chongqing, China.

<sup>3</sup>Endocrinology Department, Southwest Hospital, Third Military Medical University (Army Medical University), Chongqing, China.

\*Corresponding authors:

Yuesheng Huang, Institute of Burn Research, Southwest Hospital, Third Military Medical University (Army Medical University), Chongqing, 400038, China. Phone and fax: +86 023 68766023. E-mail: yshuang1958@163.com;

Jiongyu Hu, Endocrinology Department, Southwest Hospital, Third Military Medical University (Army Medical University), Chongqing, 400038, China. Phone and fax: +86 023 68773162. E-mail: jiongyuhu@163.com.

## Supplementary Information

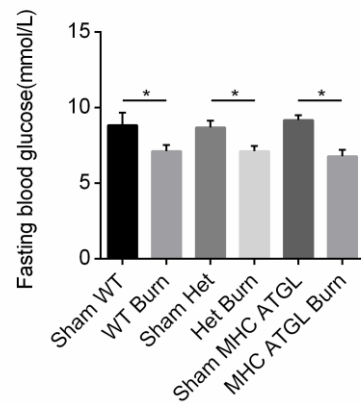

**Supplementary Figure S1 Detection of fasting blood glucose.** Fasting blood glucose (fasting 8 hours before measurement) was determined between WT, ATGL-Het and MHC-ATGL mice with or without burn injury.  $n = 8$ . Data are shown as the mean  $\pm$  SEM.  $*P < 0.05$ .  $P$  values were derived from one-way ANOVA with the appropriate posttest.
